# Supplementary material for: Distinct patterns of neurodegeneration after TBI and in Alzheimer's disease
Source: PubMed Central journal article supplement (PMC10955776; doi:10.1002/alz.12934), 2023-01-25
Supplement: ALZ-19-3065-s002.pdf [file ALZ-19-3065-s002.pdf]

# **Distinct patterns of neurodegeneration after TBI and in Alzheimer's disease**

Neil SN Graham, James H Cole, Niall J Bourke, Jonathan M Schott, David J Sharp

## **SUPPLEMENTARY**

### **METHODS**

#### **IMAGE ACQUISITION**

UCL, patients were assessed on a GE medical systems 1.5T system. An inversion recovery prepared fast spoiled gradient recalled (IR-FSPGR) sequence was used to acquire 3D volumetric T1-weighted images in AD patients and age-matched controls longitudinally with a field of view of 24 cm, with a time to repetition of 15ms, an echo time of 5.4ms, TI of 650ms, flip angle of 15°, in a 256x256 matrix, comprising 124 contiguous 1.5 mm coronal slices, resulting in a voxel size of 0.9735mm x 0.9735mm x 1.5mm.

At ICL, patients were assessed twice on the same Siemens Verio 3T system (Siemens Healthineers AG, Erlangen, Germany), alongside age-matched controls and a group of older healthy controls to assess the effect of ageing on brain structure. The MPRAGE sequence used the following parameters: slice thickness of 1mm, with 160 slices and a matrix of 256x240, with a repetition time of 2300ms, echo time of 2.98ms, flip angle 9°, field of view of 25.6cm x 24cm, with a voxel size of 1.0 x 1.0 x 1.0 mm. Diffusion MRI was available at baseline for the majority of the ICL TBI patients and age-matched healthy controls. Diffusion weighted images were acquired on the 3T Siemens Verio system in 64 directions with an isotropic voxel size of 2mm<sup>3</sup>, b = 1000 s/mm<sup>2</sup>, and with four images where b = 0 s/mm<sup>2</sup>.

## DIFFUSION TENSOR IMAGING ANALYSES

DTI analyses were performed according to standard approaches.<sup>1</sup> In brief, visual quality control checks were performed. Scans were processed using the tract based spatial statistics (TBSS) pipeline (FSL, Oxford, version 5.0.8),<sup>2</sup> with HD-BET used for improved brain extraction (Heidelberg),<sup>3</sup> and DTI-TK for generation of and tensor-based non-linear registration of individual data to a study template.<sup>4</sup> A white matter skeleton was generated by thresholding the group mean fractional anisotropy map at 0.2, and subject FA data were projected onto this skeleton.

## RESULTS

### Supplementary Figure 1. Widespread baseline reductions in FA across white matter tracts after TBI, versus healthy controls

Mean fractional anisotropy (FA) across ten tract regions of interest and a whole white matter skeleton average FA, in patients (shown in purple) and age-matched healthy volunteers (yellow) after moderate-severe TBI. Fascic.: fasciculus; WM: white matter.

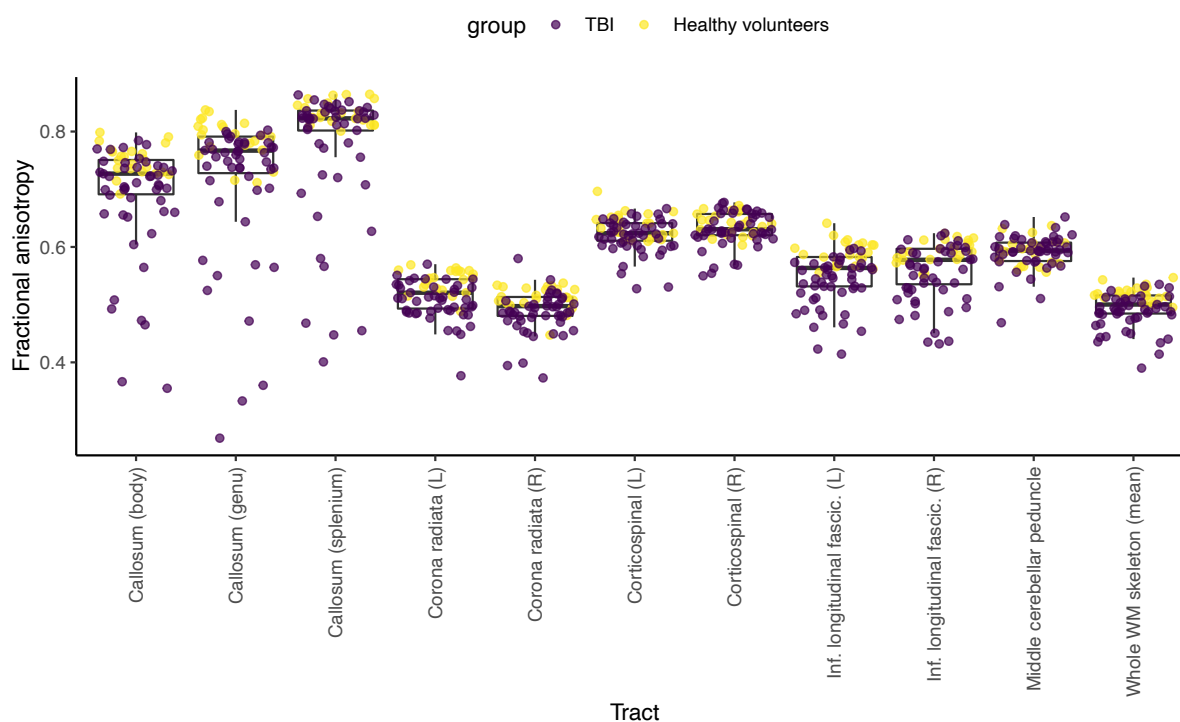

**Supplementary Figure 2. Relationship between white matter integrity at baseline and atrophy over time.**

Mean white matter skeleton fractional anisotropy (FA) is positively correlated with the Jacobian Determinant (JD) annualised brain volume change rate (%) in white matter.

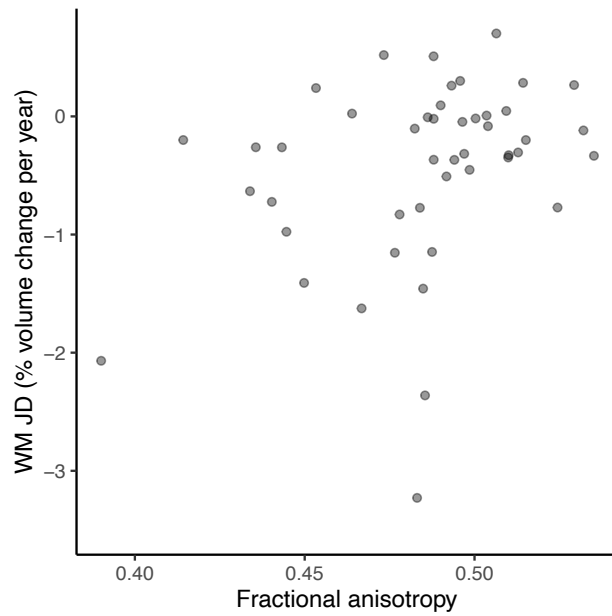

### Supplementary Figure 3. Relationship between white matter integrity and progressive atrophy across different tracts

Fractional anisotropy (FA, z-scored against aged matched healthy controls) predicts Jacobian determinant white matter volume change rate (JD, z-scored) across ten tract regions of interest. Inf.=inferior; Fasc.=fasciculus; (R)=right; (L)=left.

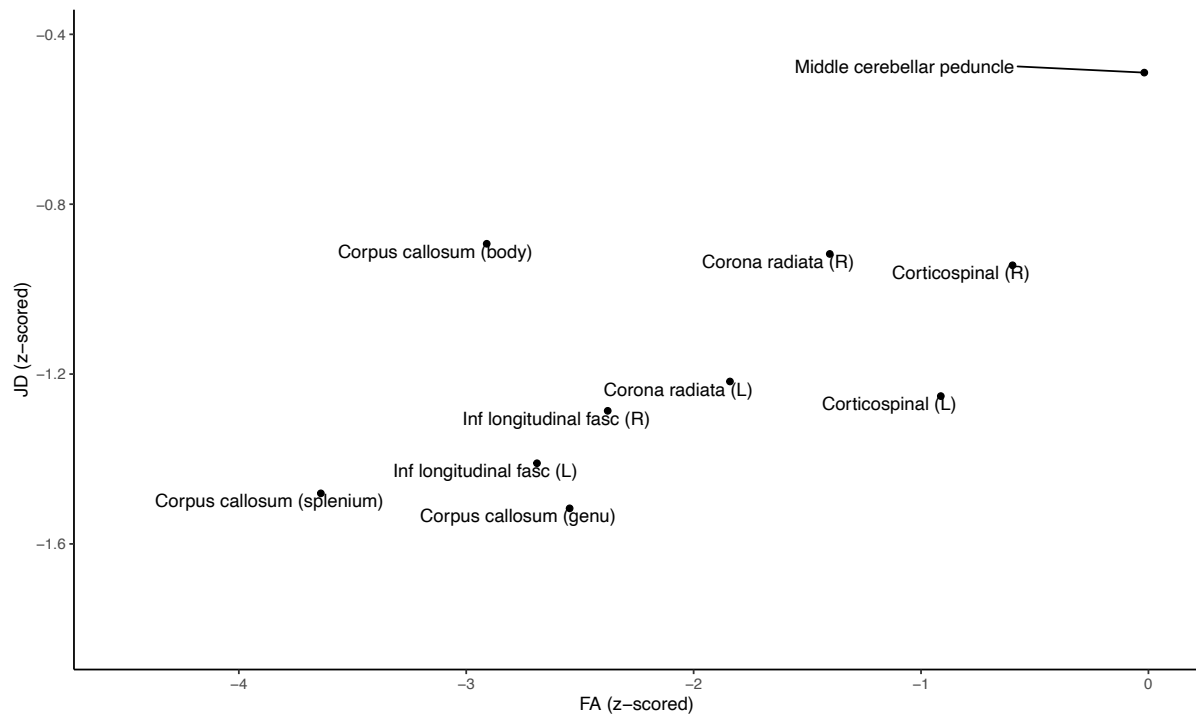

## SUPPLEMENTARY REFERENCES

1. Graham NSN, Jolly A, Zimmerman K, et al. Diffuse axonal injury predicts neurodegeneration after moderate–severe traumatic brain injury. *Brain*. 2020;doi:10.1093/brain/awaa316
2. Smith SM, Jenkinson M, Johansen-Berg H, et al. Tract-based spatial statistics: voxelwise analysis of multi-subject diffusion data. *Neuroimage*. Jul 15 2006;31(4):1487-505. doi:10.1016/j.neuroimage.2006.02.024
3. Isensee F, Schell M, Pflueger I, et al. Automated brain extraction of multisequence MRI using artificial neural networks. *Human Brain Mapping*. 2019;40(17):4952-4964. doi:<https://doi.org/10.1002/hbm.24750>
4. Zhang H, Avants BB, Yushkevich PA, et al. High-dimensional spatial normalization of diffusion tensor images improves the detection of white matter differences: an example study using amyotrophic lateral sclerosis. *IEEE Trans Med Imaging*. Nov 2007;26(11):1585-97. doi:10.1109/TMI.2007.906784
